# Supplementary material for: Rooibos (Aspalathus linearis) extract enhances boar sperm velocity up to 96 hours of semen storage
Source: PLoS One. 2017 Aug 24;12(8):e0183682. doi: 10.1371/journal.pone.0183682 (PMC5570286; doi:10.1371/journal.pone.0183682)
Supplement: S2 Dataset — (XLSX) [file pone.0183682.s002.xlsx]

## Sheet: Hoja1
Replicate	Hours	Treatment	MS	QM	SMI	PM	VAP	VCL	VSL	ALH	BCF	LIN	STR	MI	NAR
1	0	CTRL	85	3	72.5	33.7261	30.8337	44.6666	19.9639	4.60281	7.06663	45.1426	65.1375	85	98
1	2	CTRL	90	2.5	70	28.7763	31.5859	45.442	22.9242	4.67527	7.48575	51.6643	72.8139	80.5	98
1	2	FR1	75	3	67.5	41.8398	33.5604	41.2676	28.913	4.84062	8.19593	70.5159	87.2515	81	97.5
1	2	FR2	90	3.5	80	43.9271	34.5009	44.6866	25.538	4.89959	7.93742	57.1923	74.1041	88	98
1	2	FR3	90	4.5	90	48.0738	35.5861	47.0801	25.8044	5.1452	7.77146	53.7127	71.104	84	99.5
1	2	FR4	90	4	85	40.1468	33.4009	44.0362	23.4835	4.32642	8.19392	54.9423	71.9312	86.5	98
1	2	UR1	75	3	67.5	38.7387	32.6596	41.3088	25.6413	4.51316	8.07322	64.0698	80.6719	85	97.5
1	2	UR2	90	4.5	90	41.9572	37.9129	48.9751	29.4595	5.54814	7.92183	58.8659	76.42	86	99.5
1	2	UR3	90	4	85	41.6961	35.648	47.0717	24.3465	5.08876	7.98568	52.1233	68.4383	88	98.5
1	2	UR4	90	3	75	30.3457	29.5332	41.5955	21.1723	4.32864	7.62514	50.7777	70.245	85.5	98.5
1	48	CTRL	75	2.5	62.5	42.5	35.7179	52.5026	20.783	5.00499	7.65889	41.5289	60.2768	81.5	93
1	48	FR1	30	3	45	14.5098	32.2298	43.8002	25.1738	4.87789	7.84879	62.224	83.0024	78	94.5
1	48	FR2	75	3.5	72.5	54.6392	41.3553	54.705	29.6995	5.69885	7.775	56.9168	73.5176	78.5	95
1	48	FR3	75	3.5	72.5	35.3301	32.4217	45.5462	25.3564	4.58918	7.75168	55.6334	76.9494	73.5	94
1	48	FR4	80	4	80	42.1419	32.4641	45.0667	24.034	4.52352	7.83249	54.0069	74.1724	77.5	93.5
1	48	UR1	10	2	25									81.5	95
1	48	UR2	75	3.5	72.5	44.0318	32.5124	44.8137	25.1348	4.76328	7.68589	56.6782	76.8198	82	97
1	48	UR3	80	3.5	75	39.5317	32.5402	46.7123	23.6812	4.62265	7.71736	51.2447	72.4855	80	92
1	48	UR4	80	4.5	85	46.8852	34.6177	47.4536	26.3783	5.14403	7.44942	53.3374	72.9521	85	94
1	96	CTRL	50	2.5	50	8.92857	25.53	43.7699	18.3968	4.47955	6.04168	45.9771	73.1493	77.5	83.5
1	96	FR1	5	1	12.5									80.5	96
1	96	FR2	30	3	45	8.69565	30.773	44.5981	23.7654	4.18269	7.03164	57.1379	79.4598	74	95.5
1	96	FR3	60	3.5	65	48.8818	40.4876	54.0522	31.1478	5.46822	8.19916	56.1315	74.1432	78.5	94
1	96	FR4	60	3	60	42.6494	33.9742	48.5913	26.5637	4.80625	7.32962	54.0843	75.4954	77.5	94
1	96	UR1	5	1	12.5									75	94.5
1	96	UR2	30	2.5	40	9.1358	28.3816	44.5209	20.2762	4.40566	6.84983	48.2813	73.0513	72	95
1	96	UR3	60	3.5	65	39.3211	32.1674	47.2952	23.8873	4.63554	7.47338	51.7757	74.2172	77	95.5
1	96	UR4	60	3	60	40.1559	32.8418	45.7157	23.9913	4.6805	7.55997	52.059	71.9398	75	90.5
2	0	CTRL	85	3.5	77.5	56.8658	39.6817	49.7702	26.8957	5.36881	8.45488	55.996	70.0381	77	97.5
2	2	CTRL	85	3.5	77.5	56.7067	38.5527	53.1574	22.4216	5.10025	8.39022	45.5857	61.305	75.5	96.5
2	2	FR1	50	2.5	50	10.3011	23.7325	35.0103	19.8421	3.46188	7.50503	59.6165	86.334	78	96.5
2	2	FR2	85	4	82.5	61.6995	42.402	52.3051	30.2762	5.68766	8.47327	59.7961	72.9479	76.5	96.5
2	2	FR3	85	4	82.5	43.1138	32.3222	40.6057	24.5622	5.86	7.90166	62.5015	77.3945	82	96
2	2	FR4	85	4	82.5	54.3922	37.0263	45.3383	30.2355	4.98909	8.60024	66.721	80.9319	84	97
2	2	UR1	70	2.5	60	23.5945	27.5237	36.4127	22.6367	3.95112	8.08898	63.575	83.456	82.5	97.5
2	2	UR2	85	4	82.5	52.7594	37.96	47.3667	27.4826	5.27321	8.44111	58.3558	72.4981	81	93.5
2	2	UR3	85	4.5	87.5	60.071	42.5728	51.2371	31.0517	5.77447	8.60249	61.5694	74.6855	81	94
2	2	UR4	85	4.5	87.5	47.8592	36.936	45.0466	29.1838	4.99874	8.72355	64.2892	79.025	80	94
2	48	CTRL	70	2.5	60	36.4271	27.3758	42.0289	19.6759	4.12272	7.68807	49.4935	71.8436	73	93
2	48	FR1	45	2	42.5	17.0543	28.6409	39.3398	22.8513	4.80955	6.89706	59.9457	82.1024	80.5	94.5
2	48	FR2	60	3.5	65	35.4839	36.5367	48.0126	28.6917	5.24697	7.84539	60.6453	79.1337	82	92.5
2	48	FR3	80	3.5	75	44.9474	33.3709	44.1537	24.7213	4.95149	7.77108	56.7958	74.1386	76	94
2	48	FR4	75	3.5	72.5	41.1688	33.2204	41.6488	26.1429	4.66952	7.84116	61.3347	77.2267	81.5	96
2	48	UR1	5	0.5	7.5									80	92
2	48	UR2	50	2.5	50	19.8276	33.6276	43.0483	27.7394	4.66177	8.05408	65.9104	83.102	73	92
2	48	UR3	70	3	65	30.8383	30.5198	41.8238	22.8242	4.40408	7.92768	56.4173	75.0028	77	94
2	48	UR4	65	3	62.5	31.6312	33.0572	44.4461	25.1804	4.76636	7.99963	58.6118	76.161	81	95.5
2	96	CTRL	40	2	40	16.02	24.991	39.5208	18.1029	3.84824	7.22205	49.9545	73.9655	69	91.5
2	96	FR1	5	0.5	7.5									69	94.5
2	96	FR2	10	2.5	30									77.5	94
2	96	FR3	40	2.5	45	18.4669	32.161	48.3639	19.483	4.70778	7.55612	45.3779	64.1208	71	91
2	96	FR4	55	3	57.5	26.009	29.9696	43.0289	21.1517	4.2664	7.79767	51.6774	72.0245	69.5	93.5
2	96	UR1	5	0	2.5									72.5	93
2	96	UR2	5	1	12.5									69	91.5
2	96	UR3	50	3	55	23.8983	29.5863	42.5288	20.2335	4.28313	8.11842	50.5002	70.2927	75	92.5
2	96	UR4	60	3.5	65	28.2258	29.5409	41.7664	21.4231	4.11375	8.12974	53.4481	72.961	71.5	92.5
3	0	CTRL	80	3.5	75	42.9098	38.6069	51.3987	23.3312	5.43939	8.35152	47.594	63.3643	83	96.5
3	2	CTRL	75	3	67.5	34.1121	36.0921	53.233	20.7151	4.99653	7.93072	42.8832	61.9495	83.5	95.5
3	2	FR1	70	3.5	70	37.7143	37.4203	47.348	30.0252	5.78603	7.89585	63.3256	80.9229	85.5	95
3	2	FR2	80	4	80	38.4046	35.128	44.331	29.6685	5.28588	8.16422	65.6086	83.4772	81.5	93.5
3	2	FR3	75	3.5	72.5	27.1617	33.2205	41.2904	29.7463	4.88319	7.97269	68.924	87.6512	83.5	94
3	2	FR4	80	4	80	38.662	34.4157	43.7587	28.3268	5.1019	8.04907	62.7313	80.333	82.5	96.5
3	2	UR1	80	3.5	75	46.7904	37.1002	46.2958	30.7537	5.36437	8.2128	65.5958	82.6389	82.5	94
3	2	UR2	70	3.5	70	27.2093	35.9373	44.6027	30.3092	5.01322	8.48693	67.1675	84.2112	85	96
3	2	UR3	80	3.5	75	27.3034	33.4995	43.9527	25.1188	4.91603	7.95151	58.1223	75.4711	79.5	94
3	2	UR4	65	3	62.5	18.2895	28.8606	39.8519	22.6226	4.11634	7.984	58.4621	78.7809	80	90.5
3	48	CTRL	40	2.5	45	10.0587	25.748	41.9031	19.2193	4.57203	6.90263	49.2289	74.1654	69.5	90.5
3	48	FR1	10	2.5	30	4.46735	26.6341	35.5179	24.6089	5.15962	6.70968	67.6253	90.6935	82	89.5
3	48	FR2	50	3.5	60	23.0373	34.7448	47.7385	27.5339	5.3273	7.31968	57.6426	77.786	79.5	91.5
3	48	FR3	60	3.5	65	30.0475	34.3439	49.5672	23.1618	5.01274	7.49245	48.684	69.3319	75	93
3	48	FR4	55	3	57.5	22.1037	32.718	47.6193	21.141	4.76469	7.93608	45.9782	65.1299	77	89.5
3	48	UR1	5	0.5	7.5									77.5	91
3	48	UR2	50	3.5	60	22.0246	33.3177	48.1131	24.5131	4.82131	7.22041	51.877	73.801	76	91.5
3	48	UR3	50	3	55	18.6312	27.6715	40.7433	19.6932	4.78724	7.02689	50.0839	71.4388	69.5	88
3	48	UR4	60	3	60	31.6274	32.8386	50.6261	20.9503	4.82137	7.47519	44.8927	66.4597	82	89.5
3	96	CTRL	30	2	35	9.30599	29.1812	63.5081	24.3755	2.80925	11.0137	38.5047	79.6105	68.5	82.5
3	96	FR1	5	0	2.5									74	86.5
3	96	FR2	25	2	32.5	12.4079	36.1711	75.2672	30.4787	3.15666	10.8055	40.1741	80.0471	70.5	87.5
3	96	FR3	15	2	27.5	10.989	30.3933	72.1568	24.1411	2.78097	10.7764	34.0698	76.8237	75.5	89.5
3	96	FR4	30	2.5	40	11.9089	30.0601	73.0035	23.0729	2.9811	10.4471	32.5991	75.019	78.5	85.5
3	96	UR1	0	0	0									63	82.5
3	96	UR2	10	2	25	4.81928	34.73	81.7939	26.3469	3.61404	9.79429	32.7975	72.8511	70	89
3	96	UR3	15	2	27.5	14.0044	31.8696	77.6304	24.6635	3.12706	9.68311	33.9517	75.6296	75	89.5
3	96	UR4	30	2.5	40	10.0223	33.8978	76.9633	25.8688	3.03383	11.5664	34.6066	76.8582	75.5	84
4	0	CTRL	80	3.5	75	25.2896	38.6704	77.9062	30.8778	2.92666	12.409	39.4247	79.3311	84	98
4	2	CTRL	70	3	65	27.5591	36.2161	80.421	26.7582	2.81385	12.2422	34.2727	74.49	84.5	95.5
4	2	FR1	75	4	77.5	35.2288	37.8659	67.8315	33.3631	2.72065	14.5471	50.127	86.7468	90	95.5
4	2	FR2	80	4	80	34.551	40.1959	78.6183	29.6864	2.79811	12.8776	39.2416	76.147	77	93.5
4	2	FR3	80	4	80	35.9722	37.0487	82.9553	24.2227	2.7946	12.3088	31.176	68.3707	83.5	96.5
4	2	FR4	80	3.5	75	41.4155	43.5627	96.3046	24.9125	3.12256	12.3766	28.5138	62.0269	85.5	96.5
4	2	UR1	70	3.5	70	22.7273	32.0208	61.7254	26.2853	2.47046	13.322	44.2871	82.9668	85	95.5
4	2	UR2	75	3.5	72.5	36.8766	40.1859	80.365	28.2312	2.99806	13.075	37.0492	70.8768	87.5	96
4	2	UR3	80	3	70	31.9178	35.5876	82.479	22.6316	2.68905	12.2757	29.7116	67.0332	89	92
4	2	UR4	80	3.5	75	34.7586	40.4138	93.1092	23.8698	3.09633	12.0992	29.6371	64.9262	87	95.5
4	48	CTRL	70	3	65	25.2144	35.1851	84.1329	24.152	2.94329	11.5729	31.2629	71.176	83.5	86.5
4	48	FR1	30	3	45	9.55585	28.1159	55.9998	24.644	2.54514	11.9305	44.1259	83.9442	84.5	92.5
4	48	FR2	50	3.5	60	28.6369	37.9944	75.403	32.1805	3.06652	12.3322	42.9408	82.6712	82.5	94
4	48	FR3	70	3.5	70	36.896	40.0724	89.1854	28.8092	3.04947	12.3006	33.9866	71.6316	85	96
4	48	FR4	60	3	60	35.7022	41.5618	96.2753	25.7753	3.25397	11.7854	29.8242	65.0209	75	94.5
4	48	UR1	20	2	30									82.5	96
4	48	UR2	50	3	55	18.626	30.2088	70.9354	23.0918	2.62112	11.4978	35.0125	74.4715	86	93.5
4	48	UR3	65	3.5	67.5	36.2003	37.6984	88.7697	24.808	3.0581	11.7827	31.2515	67.0125	87.5	90.5
4	48	UR4	70	3.5	70	49.4092	38.8541	90.4891	24.7657	3.12959	11.8615	29.8661	66.1874	83	88.5
4	96	CTRL	50	3	55	25.5814	40.2616	88.2755	29.0835	3.19925	11.3521	34.4266	72.4017	77.5	85
4	96	FR1	5	0.5	7.5									70.5	90
4	96	FR2	30	2.5	40	9.25926	31.9036	70.0216	25.8242	2.77631	11.6644	43.5302	83.7224	76.5	92
4	96	FR3	60	3.5	65	28.0864	38.7902	84.603	28.2211	3.08473	11.7057	36.3495	73.3528	78	86.5
4	96	FR4	60	3.5	65	31.6163	41.5622	95.432	24.0587	3.27499	11.5306	30.0993	62.939	69.5	88.5
4	96	UR1	5	0.5	7.5									70.5	83
4	96	UR2	10	2	25									77	91.5
4	96	UR3	40	3	50	19.5191	29.9976	72.757	21.6125	2.55453	11.2038	32.7708	71.7562	75.5	91
4	96	UR4	50	3	55	25.7554	33.1092	81.1612	22.1488	2.87248	11.1742	32.1419	68.2589	79	88
5	0	CTRL	80	3.5	75	59.8122	44.7036	99.0612	28.563	3.45615	11.6441	29.9191	65.7783	92	96
5	2	CTRL	60	2.5	55	18.3787	26.9289	58.2921	23.2678	2.27269	12.3902	40.8501	85.0987	90	93.5
5	2	FR1	50	2.5	50	11.3855	24.6664	49.9181	22.1888	2.09206	13.7668	46.0213	90.0274	91	97
5	2	FR2	70	3.5	70	26.8386	29.2861	59.6086	26.0448	2.39952	12.6295	44.2991	88.0389	84	95.5
5	2	FR3	80	3	70	39.3154	34.9915	76.254	26.835	2.91292	11.4978	36.5468	77.7064	88.5	95.5
5	2	FR4	80	3	70	40.1079	34.9149	80.807	25.958	3.00982	11.2815	33.0842	74.2067	91.5	96
5	2	UR1	60	3	60	20.7637	27.1108	52.9283	24.2502	2.3737	12.6193	46.12	88.2382	88	97
5	2	UR2	70	2.5	60	32.9252	31.1761	64.7687	25.0927	2.59464	12.172	39.2331	79.4259	93.5	96.5
5	2	UR3	80	3.5	75	44.8687	36.1194	79.5232	27.2603	3.04311	11.8159	35.2894	75.8218	91.5	96
5	2	UR4	80	3	70	37.0064	33.4544	77.6393	24.9386	2.88352	11.7749	33.2756	74.4704	90	97
5	48	CTRL	50	3	55	25.3012	29.7573	70.4796	23.2927	2.71573	11.8462	33.8522	77.8309	85.5	91.5
5	48	FR1	20	2	30	5.03937	24.2605	56.6969	19.3871	2.67479	11.1275	37.5678	80.6306	90	93.5
5	48	FR2	50	3	55	24.8927	29.0888	70.8707	22.0896	2.66115	10.2107	33.0984	76.4789	87	94.5
5	48	FR3	60	3	60	29.5181	33.7929	82.7484	22.9275	3.04622	11.0482	29.4259	70.0523	85	92.5
5	48	FR4	70	3	65	39.779	35.7539	91.8467	22.9194	3.21343	10.236	26.5947	66.083	84.5	94.5
5	48	UR1	5	1	12.5									90	93
5	48	UR2	40	2.5	45	17.9276	30.3655	74.3752	21.6709	2.8349	10.4448	31.3876	72.4306	87.5	92
5	48	UR3	65	3	62.5	38.4858	37.3351	88.2117	24.989	3.18286	11.9202	29.6344	68.3867	89	92
5	48	UR4	70	3	65	42.362	36.6961	91.5141	23.002	3.13147	10.6217	27.3199	67.6249	89	96
5	96	CTRL	30	2	35	8.73124	26.4942	74.2584	18.845	3.33436	8.44239	25.9103	68.8446	80	86
5	96	FR1	0	0	0									74	92.5
5	96	FR2	5	0.5	7.5									81.5	92.5
5	96	FR3	40	2.5	45	18.662	32.0636	77.357	23.2847	3.10142	10.562	32.0275	73.3381	83.5	91.5
5	96	FR4	50	2.5	50	30.9609	37.8567	92.6841	25.0613	3.23992	11.298	29.2584	69.5453	80.5	91
5	96	UR1	0	0	0									73	92.5
5	96	UR2	5	0.5	7.5									80.5	90
5	96	UR3	30	2.5	40	14.9278	31.0837	74.6858	22.6078	3.07245	10.2945	32.0735	73.5067	80.5	89.5
5	96	UR4	50	2.5	50	25.3968	31.5561	78.1079	21.5935	2.81147	10.1116	30.3049	71.7269	77	90.5
CTRL= control
FR= fermented rooibos
UR= unfermented rooibos
MS= motile sperm (%)
QM= quality of movement (0–5)
SMI= sperm motility index (%)
PM=progressive motility (%)
VAP= average path velocity (μm/s)
VCL= curvilinear velocity (μm/s)
VSL= straight-line velocity (μm)
ALH= amplitude of lateral head displacement (μm)
BCF= beat-cross frequency (Hz)
LIN= linearity (%)
STR= straightness (%)
MI= membrane integrity (%)
NAR= acrosome integrity (normal apical ridge; %)
